# Supplementary material
Source: PubMed Central journal article supplement (PMC1599917)
Supplement: pnas_0603338103_1.pdf [file pnas_0603338103_1.pdf]

|                  |                   | 1                                                   | 25                 | 50      |
|------------------|-------------------|-----------------------------------------------------|--------------------|---------|
| hmm191281        | Irgb5.1           | -----MGQTSSSTPPPKEDPDLTSSFGTNLQNFMKMT-----          |                    | KILS 36 |
| hmm128592        | Irgb5.2           | -----MGQTSSSTPPPKEDPDLTSSFGTNLQNFMKMT-----          |                    | KILS 36 |
| hmm189613        | Irgb9             | -----MGQTSSSTLPPKDDPDIASFSGTNLQNFMKMT-----          |                    | KILS 36 |
| hmm190725        | Irgb2             | -----MGQTSSSTSPPKEDPPLT-----                        | FQVKT              | KVLS 27 |
| hmm129148        | Irgb7Pseudo       | -----                                               | TFQMKT             | KILS 10 |
| hmm192949        | Irgb6             | -----MAWASSFDAFFKFNFKRES-----                       |                    | KIIS 22 |
| hmm129148        |                   | QHPLLYQKQPQTSSGR - SFSVTLWLMGNFDAFFKFNFKRES-----    |                    | KIIS 43 |
| hmm191559        |                   | QHPPLHTATCQPSSSRPSRLTAQLLVFSFENFKNFKKES-----        |                    | KILS 44 |
| hmm128592        |                   | QHPPLHTATCQPSSSRPSPLMAQLLVFSFENFKNFKKES-----        |                    | KILS 44 |
| hmm190169        | Irgb8             | QHPPLHTATCQPSSSRPSPLMAQLLVISFENFKNFKKES-----        |                    | KILS 44 |
| hmm191003        | Irgb1             | QHPPLNTATCQTSTGRTSQITAAQLLEFNFKNFKNFKKES-----       |                    | KILS 44 |
| <u>hmm175574</u> | <u>Irgb10</u>     | -----MGQ - -SSSKPDAKAHMASSLTFEKFKNFKMES-----        |                    | KIIS 34 |
| hmm229405        | Irga6             | -----MGQLFS -SPKSDENDDLPSSTGYFKFKNTGR-----          |                    | KIIS 35 |
| hmm150036        | Irga1             | -----MGQLFS -LKN -KCQFLVSSVAEYFKFKKIV-----          |                    | IIL 34  |
| hmm228849        | Irga2             | -----MGQLFS -SRRS -EDQLSSSFI EYLKECEKGI-----        |                    | NIIP 34 |
| hmm151148        | Irga7             | -----MDQLLSDTSKNEEDLVSSFNAYFKNIKTE-----             |                    | KIIS 36 |
| hmm150592        | Irga4             | -----MGQLLSDTSKTEDNDLVSSFNAYFKNIKTE-----            |                    | KIIS 35 |
| hmm150314        | Irga3             | -----MGQLFSHI PKDEDKGNLESSTFEYFRNYKQET-----         |                    | KIIS 36 |
| hmm151704        | Irga8             | -----MGQLFSNMPKDEDKGILESSTFEYFRNYKQET-----          |                    | KIIS 36 |
| hmm150870        | Irga5             | -----MGQLFSGTSKSE - -ALCSSFTEYQFKFVKN-----          |                    | KIIS 33 |
| hmm191837        | Irgd              | -----MDQFISAF LKGASENSFQQLAKEFLPOYSALIS - -         | KAGGMLS            | 40      |
| hmm186086        | Irgc              | -----                                               | MATSR LPAVPEIT - - | ILMA 18 |
| hmm175852        | Irgm2             | -----MPT - -SRVAPLLDNMEEAVESPEVKFEYFSDAVFI PKDGNL   | TLS                | 42      |
| <u>hmm264951</u> | <u>Igtp/Irgm3</u> | MDLVTKLPQNIWKTFTLFINMANYLKR LISPWSKSMTAGESLYSSQNSSS |                    | 50      |
| hmm189057        | Irgm1             | ---MKPSHSSCEAAPLLPNMAETHYAPLSSAFPVTS - -            | YQTGSRL            | 42      |

|                  |                   | 51                                                             | 75 | 100 |
|------------------|-------------------|----------------------------------------------------------------|----|-----|
| hmm191281        | Irgb5.1           | QELIAFIESSLEDGNLQETVSAISSALGGIEKAPLNIAVMG <b>ETGAGKSS</b> L    |    | 86  |
| hmm128592        | Irgb5.2           | QELIAFIESSLEDGNLQETVSAISSALGGIEKAPLNIAVMG <b>ETGAGKSS</b> L    |    | 86  |
| hmm189613        | Irgb9             | QELIAFIESSLEDGNLQETVSAISSALGGIEKAPLNIAVMG <b>ETGAGKSS</b> L    |    | 86  |
| hmm190725        | Irgb2             | QELIASIESSLEDGNLQETVSAISSALGGIEKAPLNIAVMG <b>ETGAGKSS</b> L    |    | 77  |
| hmm129148        | Irgb7Pseudo       | QELITFIELYLEDDGNL - ETVSAISSALGDIEKVPLNIAVMG <b>ETGAGKSS</b> L |    | 59  |
| hmm192949        | Irgb6             | EYDITLIMTYIEENKLOKAVSVIEKVLRDIESAPLHIAV <b>TGETGAGKSTF</b>     |    | 72  |
| hmm129148        |                   | EYDITLIMTYIEENKLOKAVSVIEKVLRDIESAPLHIAV <b>TGETGAGKSTF</b>     |    | 93  |
| hmm191559        |                   | EETITLIESHLEDKNLQALSEISHALSNIDKAPLNIAV <b>TGETGTGKSSF</b>      |    | 94  |
| hmm128592        |                   | EETITLIESHLEDKNLQALSEISHALSNIDKAPLNIAV <b>TGETGTGKSSF</b>      |    | 94  |
| hmm190169        | Irgb8             | EETITLIESHLEDKNLQALSEISHALSNIDKAPLNIAV <b>TGETGTGKSSF</b>      |    | 94  |
| hmm191003        | Irgb1             | EETITLIESHLENKLNKALKEALTVISHALRNIDKAPLNIAV <b>TGETGTGKSSF</b>  |    | 94  |
| <u>hmm175574</u> | <u>Irgb10</u>     | KETIDSIQSCIQEGDIQKVISIINAALTDIEKAPLNIAV <b>TGETGAGKSTF</b>     |    | 84  |
| hmm229405        | Irga6             | QEILNLIELMRMKNIGLQTNLSAISDALKEIDSSVLNVA <b>VGTGSGKSSF</b>      |    | 85  |
| hmm150036        | Irga1             | QEVTTSLIELDMKKENFQANSAICDALKEIDSSVLNVA <b>VGTGSGKSSF</b>       |    | 84  |
| hmm228849        | Irga2             | HEIITSIEINMKKGNIQEVNSTVRDMLREIDNTPLNVA <b>LGTGSGKSSF</b>       |    | 84  |
| hmm151148        | Irga7             | QETIDLIELHLNKNIGHANSILREALKNIDNAPINIAV <b>TGESGVGKSSF</b>      |    | 86  |
| hmm150592        | Irga4             | QETIDLILKLYLNKNIGHANSILSDALRNIDNAPINIAV <b>TGESGAGKSSL</b>     |    | 85  |
| hmm150314        | Irga3             | EETTRSIELCLKRGDFQRANSVSDALKNIDNTPINIAV <b>TGESGAGKSSL</b>      |    | 86  |
| hmm151704        | Irga8             | EETTRSIELCLKKGDIQRANSVSDALKNIDNAPINIAV <b>TGESGAGKSSL</b>      |    | 86  |
| hmm150870        | Irga5             | QIESTLIELYLTLGDVQANNAIYALR - LARTPONVALI <b>GESGRGKYSF</b>     |    | 82  |
| hmm191837        | Irgd              | PETLTLGHKALQEGNLQKVIQIQKASAEANAILEVA <b>VIQSGSTGKSSF</b>       |    | 90  |
| hmm186086        | Irgc              | KEELEALRTAFESGDIPOAASRLRELLANSETTRLEV <b>GVGTGESGAGKSSL</b>    |    | 68  |
| hmm175852        | Irgm2             | PVVIKRIETAVKGEVVKVVISVKEI IQNSRNKIKIAV <b>TGDSGNMGSSF</b>      |    | 92  |
| <u>hmm264951</u> | <u>Igtp/Irgm3</u> | GEVIEDIGKAVTEGNLQKVIQVKEIQKSRVYRKIAV <b>TGDSGNMGSSF</b>        |    | 100 |
| hmm189057        | Irgm1             | PEVSRSTERALREGKLELVYGIKETVATLSQIPVSI <b>FVTGDSGNMGSSF</b>      |    | 92  |

**GXXXXGM/KS**

|                  |                   | 101                                                                                             | 125 | 150 |
|------------------|-------------------|-------------------------------------------------------------------------------------------------|-----|-----|
| hmm191281        | Irgb5.1           | INALQGVGDDEEGAAASTGVVH <b>TTERT</b> PTY - TKFPSVTLWDL <b>PGIGST</b>                             |     | 135 |
| hmm128592        | Irgb5.2           | INALQGVGDDEEGAAASTGVVH <b>TTERT</b> PTY - TKFPSVTLWDL <b>PGIGST</b>                             |     | 135 |
| hmm189613        | Irgb9             | INALQGVGDDEEGAAASTGVVH <b>TTERT</b> PTY - TKFPSVTLWDL <b>PGIGST</b>                             |     | 135 |
| hmm190725        | Irgb2             | INALQGVGDDEEGAAASTGVVH <b>TTERT</b> PTY - TKFPSVTLWDL <b>PSIGST</b>                             |     | 126 |
| hmm129148        | Irgb7Pseudo       | INALQGTGADEGGVTPAVGVV <b>TTIEK</b> SYYP - TKFPSAILWDL <b>PAIGST</b>                             |     | 108 |
| hmm192949        | Irgb6             | INTLRGVGHEEKGAAP - TGA <b>IETT</b> MKRT <b>TPYPH</b> - PKLPNVTI <b>WDLPGIGT</b>                 |     | 120 |
| hmm129148        |                   | INTLRGVGHEEKGAAP - TGA <b>IETT</b> MKRT <b>TPYPH</b> - PKLPNVTI <b>WDLPGIGT</b>                 |     | 141 |
| hmm191559        |                   | INTLRGVRDEEEGAAP - TGV <b>VETT</b> MKRT <b>TPYPH</b> - PKLPNVTI <b>WDLPGIGST</b>                |     | 142 |
| hmm128592        |                   | INTLRGVRDEEEGAAP - TGV <b>VETT</b> MKRT <b>TPYPH</b> - PKLPNVTI <b>WDLPGIGST</b>                |     | 142 |
| hmm190169        | Irgb8             | INTLRGVRDEEEGAAP - TGV <b>VETT</b> MKRT <b>TPYPH</b> - PKLPNVTI <b>WDLPGIGST</b>                |     | 142 |
| hmm191003        | Irgb1             | INALRGISSEEKDAAP - TGV <b>IETT</b> MKRT <b>TPYPH</b> - PKLPNVTI <b>WDLPGIGST</b>                |     | 142 |
| <u>hmm175574</u> | <u>Irgb10</u>     | INALRGIGHEE - SESAESGAV <b>TTDR</b> KKYTH - PKFPNVTI <b>WDLPGVGT</b>                            |     | 132 |
| hmm229405        | Irga6             | INTLRGIGNEEEGAAP - TGV <b>VETT</b> MERHPYKH - PNI <b>PNVF</b> WDL <b>PGIGST</b>                 |     | 133 |
| hmm150036        | Irga1             | INTLRGIGHEEEGAAP - TGV <b>V</b> EATMERHPYKH - PN <b>MNVF</b> WDL <b>PGIGST</b>                  |     | 132 |
| hmm228849        | Irga2             | INTLRGIGHEEEGAAP - TGV <b>T</b> DKKERHPYEH - PK <b>MNVF</b> WDL <b>PGTGSE</b>                   |     | 132 |
| hmm151148        | Irga7             | INALIGTGPEEEGAAP - VGV <b>IETT</b> MKRN <b>FYKH</b> - PK <b>IETL</b> TWDL <b>PGIGTQ</b>         |     | 134 |
| hmm150592        | Irga4             | INALIGIGPEEEGAAP - VGV <b>IETT</b> MKRT <b>SYKH</b> - PK <b>IETL</b> TWDL <b>PGIGTQ</b>         |     | 133 |
| hmm150314        | Irga3             | INALREVKAEEESAAE - VGV <b>TETT</b> MKV <b>SYKH</b> - PK <b>VKNL</b> TWDL <b>PGIGTM</b>          |     | 134 |
| hmm151704        | Irga8             | INALREIKAEESAAE - VGV <b>TETT</b> MKV <b>SYKH</b> - PK <b>VKNL</b> TWDL <b>PGIGTQ</b>           |     | 134 |
| hmm150870        | Irga5             | INXLQGVGHEEENAVT - VGV <b>VETT</b> MNRT <b>TPYRN</b> - PNI <b>PNVI</b> WDL <b>PGIGST</b>        |     | 130 |
| hmm191837        | Irgd              | INALRGLGHEADESAD - VGT <b>VETT</b> MCKT <b>TPYQH</b> - PK <b>YPKVI</b> F <b>WDLPGTGTP</b>       |     | 138 |
| hmm186086        | Irgc              | INALRGLGAEDEGAAL - TGV <b>VETT</b> MQ <b>PSYPH</b> - PQ <b>FPDVT</b> WDL <b>PLGAGSP</b>         |     | 116 |
| hmm175852        | Irgm2             | INALRLIGHEEKDAP - TGV <b>VETT</b> QK <b>PTCYFS</b> - SH <b>FPV</b> ELWDL <b>PGLGAT</b>          |     | 140 |
| <u>hmm264951</u> | <u>Igtp/Irgm3</u> | INALRFIGHEEEDAP - TGV <b>VRTT</b> K <b>KPAC</b> YSSDS <b>SHFP</b> V <b>ELWDL</b> P <b>GLGAT</b> |     | 149 |

| hmm189057 | Irgm1       | INALRVIGHDEDAAP-TGVVVRTKTRTEYSS-SHFPNVVLLDPLGLGAT    | 140 |
|-----------|-------------|------------------------------------------------------|-----|
|           |             | <b>DXGX</b>                                          |     |
|           |             | 151   175   200                                      |     |
| hmm191281 | Irgb5.1     | AFQPHDYLLKKIEFEEDYDFIIIVSSGRFKHNDDELAKAIVQMNRSFYFVRT | 185 |
| hmm128592 | Irgb5.2     | AFQPHDYLLKKIEFEEDYDFIIIVSSGRFKHNDDELAKAIVQMNRSFYFVRT | 185 |
| hmm189613 | Irgb9       | AFQPHDYLLKKIEFEEDYDFIIIVSSGRFKHNDDELAKAIVQMNRSFYFVRT | 185 |
| hmm190725 | Irgb2       | AFQPHDYLLKKIEFEEDYDFIIIVSARIKQSDIELAKAIVQMNRGLYFVRT  | 176 |
| hmm129148 | Irgb7Pseudo | HFQPHDYLLKKIKFEEDYDFIIIVSAGRIKHSDELAKAIVQMNRGLYFNRT  | 157 |
| hmm192949 | Irgb6       | NFTPQNYLTEMKFGEYDFIIISATRFKENDAQQLAKAIAQGMNMFYFVRT   | 170 |
| hmm129148 | Irgb6       | NFTPQNYLTEMKFGEYDFIIISATRFKENDAQQLAKAIAQGMNMFYFVRT   | 191 |
| hmm191559 | Irgb6       | TFPPQNYLTEMKFGEYDFIIISATCFKEIDAHLAKTIEKMNTKFFYFVRT   | 192 |
| hmm128592 | Irgb6       | TFPPQNYLTEMKFGEYDFIIISATRFKEIDAHLAKTIEKMNTKFFYFVRT   | 192 |
| hmm190169 | Irgb8       | NFQPQNYLTEMKFGEYDFIIISATRFKEIDAHLAKTAKMNTKFFYFVRT    | 192 |
| hmm191003 | Irgb1       | NFPQNYLTEMKFGEYDFIIISATRFKEIDAHLAKTAKMNIKFFYFVRT     | 192 |
| hmm175574 | Irgb10      | NFKPEEYLLKMKFQEQYDFFLIISSARFQNEAQLAEAIKMKKKFFYFVRT   | 182 |
| hmm229405 | Irga6       | NFPNPTYLEKMKFYEYDFIIISATRFKKNDDIAKAIKSMKKEFFYFVRT    | 183 |
| hmm150036 | Irga1       | KFPKPTYLEKMKFYEYDFIIISATCFKKNDDIDLAKAISMMKKEFFYFVRT  | 182 |
| hmm228849 | Irga2       | DFQPKTYLEKMKFYEYDFIIISATRFKKNDDIDLAKAIGIMKKEFFYFVRT  | 182 |
| hmm151148 | Irga7       | KFPKPTYLEEVKFKFYEYDFIIIVSSTRFTKHELDLAKAIGIMKKNYFVRT  | 184 |
| hmm150592 | Irga4       | KFPKPTYLEEVKFKFYEYDFIIISATRFKHELDLAKAIGIMKKNYFVRT    | 183 |
| hmm150314 | Irga3       | KFQPKDYLEKVFVKFYDFIIIVSSSRFTKLELDLAKATRIMKKNYFVRT    | 184 |
| hmm151704 | Irga8       | KFPKPTYLETEVFKFYDFIIIVSSTRFTNHEIELAKAIRMKKNYFVRT     | 184 |
| hmm150870 | Irga5       | NFPKHYLLKMKQIYSYDLIIIVASEQFSLNHVKLAITMQRMRKFFYVVT    | 180 |
| hmm191837 | Irgd        | NFHADAYLDQVGFANDYDFIIISSSRFSLNDALLAQKIKDAGKFFYFVRT   | 188 |
| hmm186086 | Irgc        | GCSADKYLKQVDFGRYDFLLVSPRRCGAVESRLASEIRLQGGKFFYFVRT   | 166 |
| hmm175852 | Irgm2       | AQSVESYLEEMQISTFDLIIIVASEQFSLNHVKLAITMQRMRKFFYVVT    | 190 |
| hmm264951 | Iqtp/Irgm3  | AQSVESYLEEMQISTFDLIIIVASEQFSLNHVKLAITMQRMRKFFYVVT    | 199 |
| hmm189057 | Irgm1       | AQTVEDYVEEMKFSTCDLFIIVASEQFSLNHVKLSKI IQSMGRKFFYVVT  | 190 |

| hmm191281 | Irgb5.1     | HTDLDLMVVKRSNPRFRNRENTLKQIRHTISSMLKEVTHQEPVFLVSNF    | 235 |
|-----------|-------------|------------------------------------------------------|-----|
| hmm128592 | Irgb5.2     | HTDLDLMVVKRSNPRFRNRENTLKQIRHTISSMLKEVTHQEPVFLVSNF    | 235 |
| hmm189613 | Irgb9       | HTDLDLMVVKLSDRPKFNKNILEQIRNSINILKEVTHQEPVFLVSNF      | 235 |
| hmm190725 | Irgb2       | KTDSDLNEKKNPMPFRNRENTLKSIRICLSSNLKERFQEPVFLVSNF      | 226 |
| hmm129148 | Irgb7Pseudo | KTDIDLKNEKLYNPMFRNRENTLKSQICISSNLKECFHQEPVFLVSNF     | 207 |
| hmm192949 | Irgb6       | KIDSDDLNEQKPKPKSFNKEEVLKNIKDYCSNHLQESLDSEPPVFLVSNV   | 220 |
| hmm129148 | Irgb6       | KIDSDDLNEQKPKPKSFNKEEVLKNIKDYCSNHLQESLDSEPPVFLVSNV   | 241 |
| hmm191559 | Irgb6       | KIDQDVSNQSRKPRSFNRDSVLKRIIDDCSGHLQKALSSQPPVFLVSNF    | 242 |
| hmm128592 | Irgb6       | KIDQDVSNQSRKPRSFNRDSVLKRIIDDCSGHLQKALSSQPPVFLVSNF    | 242 |
| hmm190169 | Irgb8       | KIDQDVSNQSRKPKPSFNDRDSVLKRIIDDCSGHLQKALSSQPPVFLVSNF  | 242 |
| hmm191003 | Irgb1       | KIDQDISNEQSRKPKPSFNDRDSVLKRIIDDCSGHLQKALSSQPPVFLVSNF | 242 |
| hmm175574 | Irgb10      | KIDSLWNEKAKKPPSYNREKILEVIRSDCVKNLQNAANASTRVFLVSSF    | 232 |
| hmm229405 | Irga6       | KVDSDI TNEADGKQPQTFDKEKVLQDIRLNCVNTFRENGIAEPIIFLLSNK | 233 |
| hmm150036 | Irga1       | KVDTDLRNEEDFKPQTFDKEKVLQDIRLNCVNTFRENGIAEPIIFLLSNK   | 232 |
| hmm228849 | Irga2       | QVDSDLRNEEDFKPQTFDKEKVLQDIRLNCVNTFRENGIAEPIIFLLSNK   | 232 |
| hmm151148 | Irga7       | KVDIDLENERKSKPRFTDREKTLKQIQSYAMNTFSDNNMAEPIIFLMVSNY  | 234 |
| hmm150592 | Irga4       | KVDIDVENERKSKPRFTEREKALKQIQSYSVKIFNDNNMAEPIIFLLSNK   | 233 |
| hmm150314 | Irga3       | KVDIDLNEKSKPRFNRENTLNQVIRNSYLDTFRESKIDEPQVFLISNH     | 234 |
| hmm151704 | Irga8       | KVDFDYNEEKSKPRFNRENTLNQIRNSYLDTFRESKIDEPQVFLISNH     | 234 |
| hmm150870 | Irga5       | KEDIDIEN--KQCKDSFGRTEFLQHIS-HHVNVFKKSNLYVPLLILLISNR  | 227 |
| hmm191837 | Irgd        | KVDSDLVNEQKAKPIFMPKKEKVLQDIRDYCVNTLIKTGTVEPTFLISNL   | 238 |
| hmm186086 | Irgc        | KVDEDLAAATRSQRPSGFSEAAVLEQDIRDHCTERLRVAGVNDPRIFLVSNL | 216 |
| hmm175852 | Irgm2       | KLDRDLSTSTFPEPQ-----LLQSIQRNIRDSLQKEKVKHEPMLFVLSVF   | 234 |
| hmm264951 | Iqtp/Irgm3  | KLDRDLSTSTFPEPQ-----LLQSIQRNIRENLQQAQVRDPLFLISCF     | 243 |
| hmm189057 | Irgm1       | KLDRDLSTSVLSEVR-----LLQNIQENIRENLQKEKVKYPPVFLVSSL    | 234 |

| hmm191281 | Irgb5.1     | DVSDFDFFPKLESTLLSQLPAYKHHMFMLTLPITVDSTIDRKRDLMLKQKVV  | 285 |
|-----------|-------------|-------------------------------------------------------|-----|
| hmm128592 | Irgb5.2     | DVSDFDFFPKLESTLLSQLPAYKHHMFMLTLPITVDSTIDRKRDLMLKQKVV  | 285 |
| hmm189613 | Irgb9       | DVSDFDFFPNLESTLLSQLPAYKHHMFMLTLPITVDSTIDRKRDLMLKQKIW  | 285 |
| hmm190725 | Irgb2       | DVSDFDFFPKLESTLLSQLPAYKHQIFMSTLQVVINAIIVDRKRDLMLKQKIW | 276 |
| hmm129148 | Irgb7Pseudo | DVSDFDFFPKLESTLLSQLPAYKHQIFMSTLQVVINAIIVDKRDLMLKQKIV  | 257 |
| hmm192949 | Irgb6       | DISKYDFPKLETLLQDLPAHKRHVFSLSLQSLTEATINYKRDSLQKQVF     | 270 |
| hmm129148 | Irgb6       | DISKYDFPKLETLLQDLPAHKRHVFSLSLQSLTEATINYKRDSLQKQVF     | 291 |
| hmm191559 | Irgb6       | DVSDFDFFPKLETLLRELPAHKRHLFMMSLHSVTETAIARKRDFLRQKIW    | 292 |
| hmm128592 | Irgb6       | DVSDFDFFPKLETLLRELPSHKRHLFMMSLHSVTETAIARKRDFLRQKIW    | 292 |
| hmm190169 | Irgb8       | DVSDFDFFPKLENTLLRELPAHKRHLFMMSLHSVTETAIARKRDFLRQKIW   | 292 |
| hmm191003 | Irgb1       | DVSDFDFFPKLETLLRELPAHKRHLFMMSLHSVTETTARKRDFLRQKIW     | 292 |
| hmm175574 | Irgb10      | EVAQDFPFSLESTLLEELPAHKRHIFVQCLPTITEPAIDRRRDVLKQTIW    | 282 |
| hmm229405 | Irga6       | NVCHYDFPVLMDKLIIDLPYKRRHFMVSLPNIITDSVIEKQRQFLKQRIW    | 283 |
| hmm150036 | Irga1       | NVCHYDFPVLMDKLIIDLPVFKRQNFMSLNPNIITDSVIEKRRNFRLRKTIW  | 282 |
| hmm228849 | Irga2       | NVCHYDFPVLMDKLIIDLPVFKRQNFMSLNPNIITDSVIEKRRNFRLRKTIW  | 282 |
| hmm151148 | Irga7       | DLSKYDFPVLMDTLIKDLHAEKRRHFMVSLPGITEAADRKHATQQPIW      | 284 |
| hmm150592 | Irga4       | DLSYDFPVLMDTLIKDLHAEKRRHFMVSLPNFTDQAITDRKHATQQPIW     | 283 |
| hmm150314 | Irga3       | DLSYDFPVLMDTLKDLPAEKRQNFLLSLPNIITEAIIQKKYNSTKQIWIW    | 284 |
| hmm151704 | Irga8       | DLSYDFPVLMDTLKDLPAEKRQNFLLSLPNIITEAIIQKKYNSTKQIWIW    | 284 |
| hmm150870 | Irga5       | NVSDYDFPILKTRLLKRNKMSITHRTIMFSFPTITEAATERKHNSIQQPIW   | 277 |
| hmm191837 | Irgd        | DLGAFDFPKLEETLLKELPGHKRHMFAALLPNIIDSAIELKHHFLREKIW    | 288 |

|                  |                   |                                                      |     |
|------------------|-------------------|------------------------------------------------------|-----|
| hmm186086        | Irgc              | SPTRYDFPMLVTTWEHDLPAHRRHAGLLSLPDISLEALQKKKMDLQEQVL   | 266 |
| hmm175852        | Irgm2             | KPSEHDFPKLRETLQKDLPLVIRKYHGLVETLYQVCEKTVNERVSIKKS-I  | 283 |
| <u>hmm264951</u> | <u>Iqtp/Irgm3</u> | SPSFHDFPELRNLTQKDI FVIRYRDLPEIISQVCDKCI SNKAFSLKEDQM | 293 |
| hmm189057        | Irgm1             | DPLLDFPKLRDRTLHKDLSNIRCCPEPLKTYLGYEKIVGDKVAVWQQR-I   | 283 |

|                  |                   |                                       |              |          |     |
|------------------|-------------------|---------------------------------------|--------------|----------|-----|
|                  |                   | 301                                   | 325          | 350      |     |
| hmm191281        | Irgb5.1           | KESTMPRAWATIPSLGLTQK-DMEMLQOTLNDYRS   | SFGLDEASLENI | AED      | 334 |
| hmm128592        | Irgb5.2           | KESTMPRAWATIPSLGLTQK-DMEMLQOTLNDYRS   | SFGLDEASLENI | AED      | 334 |
| hmm189613        | Irgb9             | KESIMPRAWATIPSRGLTQK-DMEMLQOTLNDYRS   | SFGLDEASLENI | AED      | 334 |
| hmm190725        | Irgb2             | KESIMPRAWATIPSRGLTQK-DMEMLQOTLNDYRS   | SFGLNEASLENI | AED      | 325 |
| hmm129148        | Irgb7Pseudo       | KESTTPRAWATIPSLGLTQK-DMEMLQOTLNDYRS   | SFGLDEASLENI | AED      | 306 |
| hmm192949        | Irgb6             | LEAMKAGALATIPLGGMISD-ILENLDETFNLYRSY  | FGLDDASLENI  | AQD      | 319 |
| hmm129148        |                   | LEAMKAGALATIPLGGMISD-ILENLDETFNLYRSY  | FGLDDASLENI  | AQD      | 340 |
| hmm191559        |                   | LEALKAGVWATIPPLGGLVRN-KMQKLEETLTLYRSY | FGLDEASLENI  | AKD      | 341 |
| hmm128592        |                   | LEALKAGLWATIPPLGGLVRN-KMQKLEETLTLYRSY | FGLDEASLENI  | AKD      | 341 |
| hmm190169        | Irgb8             | LEALKAGVWTTIPPLGGLVRD-KMQKLEETLTLYRSY | FGLDEASLENI  | AKD      | 341 |
| hmm191003        | Irgb1             | LEALKAGLWATIPPLGGLVRD-KMQKLEETLTLYRSY | FGLDEASLENI  | AKD      | 341 |
| <u>hmm175574</u> | <u>Irgb10</u>     | LEALKAGASATIPMMSFND-DIEEFKILSHYRAC    | FGLDDESLEN   | MAKE     | 331 |
| hmm229405        | Irga6             | LEGFAADLVNIPSLTFLDSDLETLLKKSMMKFYRTV  | FGVDDETS     | LQRLARD  | 333 |
| hmm150036        | Irga1             | LQGFAGVLLX-IPSLTFLDSDSHRTLKXSMKFYPI   | VFGVDES      | PLS-LARA | 330 |
| hmm228849        | Irga2             | LEGFADGLLS-----FFLESDELTEKSMKFYRTV    | FGVDDAS      | LQRLARA  | 326 |
| hmm151148        | Irga7             | LEAFNVGLLANFPVVTGILGDNDVTKLEKSLNYYRK  | IFGVDDSE     | LELVAKD  | 334 |
| hmm150592        | Irga4             | LEAFKIGVVAIFPVGLNLRNKMKKIKNTLNYQKIF   | FGVDDSE      | LELVAKD  | 333 |
| hmm150314        | Irga3             | LQATKDGLLATVPVVGILKDLDKERLKRRLDYRDL   | FGVDDSE      | LMFMAKD  | 334 |
| hmm151704        | Irga8             | LQAMKDGLLATVPVVGILKDLDKERLKRSLDYRDL   | FGIDDES      | LMFMAKD  | 334 |
| hmm150870        | Irga5             | LEAFKIGVLMITPEVVGILKDSVDKRLKMSLNYYR   | VLFRIDDA     | TEVFMAKD | 327 |
| hmm191837        | Irgd              | LEALKSAAVSFIPFMTFFKGFDPPEQEQLKDYRSY   | FGLDDQS      | IKEIAEK  | 338 |
| hmm186086        | Irgc              | KTALVSGVIQALPVPGLAAAYDDALLRSLRGYHRS   | FGLDDDSL     | AKLAEQ   | 316 |
| hmm175852        | Irgm2             | DEDNLHTEFLG-----ISDPGNAIBIRKAFQKTF    | GLDDISLH     | LVALE    | 324 |
| <u>hmm264951</u> | <u>Iqtp/Irgm3</u> | LMKDLEAAVSS-----EDDTANLERGLQTYQKIF    | FGVDDGSL     | QQVARS   | 335 |
| hmm189057        | Irgm1             | ANESLKNLSL-----VRDDNMGECLKVYRLIF      | FGVDDSE      | VQQVAQS  | 324 |

|                  |                   |                                     |             |                      |     |
|------------------|-------------------|-------------------------------------|-------------|----------------------|-----|
|                  |                   | 351                                 | 375         | 400                  |     |
| hmm191281        | Irgb5.1           | LNV-TLEELKANI KSPHLLSDEPDTSL-----   | TEKLLKYIGNP | ---                  | 371 |
| hmm128592        | Irgb5.2           | LNV-TLEELKANI KSPHLLSDEPDTSL-----   | TEKLLKYIGNP | ---                  | 371 |
| hmm189613        | Irgb9             | LNV-TLEELKANI KSPHLLSDEPDTSL-----   | TEKLLKYIGNP | ---                  | 371 |
| hmm190725        | Irgb2             | LNV-TLEELKANI KSPHLSDEPDTSL-----    | TEKLLKYIGNP | ---                  | 362 |
| hmm129148        | Irgb7Pseudo       | LNV-TLEELKANI KSPHLLSDEPDTSL-----   | TEKLLKYIGNP | ---                  | 343 |
| hmm192949        | Irgb6             | LNM-SVDDFKVHLRFPHLFAHNDES           | -----       | EDLKFYIKHISV         | 359 |
| hmm129148        |                   | LNM-SVDDFKVHLRFPHLFAHNDES           | -----       | EDLKFYIKHISV         | 380 |
| hmm191559        |                   | FNV-SVNEIKAHLRSLQLLTKNNDMSF         | -----       | KEKLLKYI EYISCV      | 381 |
| hmm128592        |                   | FNV-SVNEIKAHLRSLQLLTKNNDMSF         | -----       | KEKLLKYI EYISCV      | 381 |
| hmm190169        | Irgb8             | FNV-SVNEIKAHLRSLQLLTKNNDMSF         | -----       | KEKLLKYI EYISCV      | 381 |
| hmm191003        | Irgb1             | FNV-SVNEIKAHLRSLQLLTKNNDMSF         | -----       | KEKLLKYI EYISCV      | 381 |
| <u>hmm175574</u> | <u>Irgb10</u>     | FNV-SVEEESTIKSPHLLSSEPNESV          | -----       | ADKLVYIMEKISV        | 371 |
| hmm229405        | Irga6             | WEI-EVDQVEAMIKSPA VF KP TDEETI      | -----       | QERLSRYIQEFCLA       | 373 |
| hmm150036        | Irga1             | WKI-EVDLKEAMKKS PAVFKPTDEESI        | -----       | QERLSRYIQKFCLA       | 370 |
| hmm228849        | Irga2             | WEIQDQVVRAMIKSPA VF KP TDEETI       | -----       | QERLSRYNQEFCLA       | 367 |
| hmm151148        | Irga7             | FQV-PVEQVKEIMKSPHLLKTNGKETL         | -----       | GEKLLKYLEKFPETA      | 374 |
| hmm150592        | Irga4             | FQV-PVEQVKTKMTPHLLKKYREETF          | -----       | RN----DFKLLVST       | 369 |
| hmm150314        | Irga3             | AQV-PVELLIKNLKSPLLKCC-KEETL         | -----       | ELLNCKVEKFASA        | 373 |
| hmm151704        | Irga8             | AQV-PVELLKI KLSPYLLEL-EEETL         | -----       | GGLILNCVEKFASA       | 373 |
| hmm150870        | Irga5             | SQV-PINIIYIYSK                      | -----       | -----                | 340 |
| hmm191837        | Irgd              | LGA-PLADIKGELKCLDFWSLVKDNSI         | -----       | IAQATSAAEAFCAV       | 378 |
| hmm186086        | Irgc              | VGK-QAGDLRSVIRSPLANEVSPETVLRLYSQSSD | GAMRVARAF   | FERGIPV              | 365 |
| hmm175852        | Irgm2             | MKN-KHFNT--SMESQ--ETQRQY--          | -----       | DDWVLARLYRTGRVGSIG   | 363 |
| <u>hmm264951</u> | <u>Iqtp/Irgm3</u> | TGR-LEMGRS-ALQFQ--DLIKMRR           | -----       | LELMMGFVAVNKFLRLLESS | 376 |
| hmm189057        | Irgm1             | MGT-VVMEYKDNMKSQNFYTLRREDWK         | ---         | LRLMTCIAVNAFFRLLR--  | 367 |

|                  |               |                                      |                    |     |     |
|------------------|---------------|--------------------------------------|--------------------|-----|-----|
|                  |               | 401                                  | 425                | 450 |     |
| hmm191281        | Irgb5.1       | -----YFSKVFLHQLNYFIDTVASDVKIILSKEEL  | FTEQVSSFNSKA       |     | 412 |
| hmm128592        | Irgb5.2       | -----YFSKVFLHQLNYFIDTVASDVKIILSKEEL  | FTEQVSSFNSKA       |     | 412 |
| hmm189613        | Irgb9         | -----YFSKVFLHQLNYFIDTVASDVKIILSKEEL  | FTEQVSSFNSKA       |     | 412 |
| hmm190725        | Irgb2         | -----YFSKVFLHQLNYFIDTVASDVKIILSKEEL  | FTEQVSSFNSKA       |     | 403 |
| hmm129148        | Irgb7Pseudo   | -----YFSKVFLHQLNYFIDTVASDVKIILSKEEL  | FTEQVSSFNSKA       |     | 376 |
| hmm192949        | Irgb6         | TGGPVAAVTTYRMAYYLQNLFLDTAANDAIALLNSK | ALFEKKVGPYI        | SEP | 409 |
| hmm129148        |               | TGGPVAAVTTYRMAYYLQNLFLDTAANDAIALLNSK | ALFEKKVGPYI        | SEP | 430 |
| hmm191559        |               | TGGPLASGLYFRKTYWQSLFIDTVASDAKSLLNKEE | FLSEKPGSCLSDL      |     | 431 |
| hmm128592        |               | TGGPLASGLYFRKTYWQSLFIDTVASDAKSLLNKEE | FLSEKPGSCLSDL      |     | 431 |
| hmm190169        | Irgb8         | TGGPLASGLYFRKTYWQSLFIDTVASDAKSLLNKEE | FLSEKPGSCLSDL      |     | 431 |
| hmm191003        | Irgb1         | TGGPLASGLYFRKTYWQSLFIDTVASDAKSLLNKEE | FLSEKPGSCLSDL      |     | 431 |
| <u>hmm175574</u> | <u>Irgb10</u> | TGGFVATGLYFRKSYMQNYFLDTVTEDAKVL      | LKKVFLQDSVDSE---   |     | 417 |
| hmm229405        | Irga6         | NGYLLPKNSFLKEIFLYLKYFLDMVTEDAKTLKEI  | ICLRN-----         |     | 413 |
| hmm150036        | Irga1         | NGYLLTKNYLREMFYLKFLDMVTE-ARTLLKEICFN | -----              |     | 409 |
| hmm228849        | Irga2         | NGYLLPKN-HCREILYLKLYFLDMVTEDAKTL     | LKEICLRNLLPGTGGTCL |     | 416 |
| hmm151148        | Irga7         | TGGLLAVGLYFRKTYLQLHFLDTVTEDAKVL      | LRWNTSKN-----      |     | 414 |
| hmm150592        | Irga4         | FGRLLAVGLYFPAIYYLQLHILDTVTEDAKVL     | LRWTSKPRNSTYP----- |     | 416 |
| hmm150314        | Irga3         | NGLLAAGLYFRKTYLQFHFLDTVAEDAKVLL      | KAAQTHFAHSF-----   |     | 417 |

|                  |                   |                                                      |     |
|------------------|-------------------|------------------------------------------------------|-----|
| hmm151704        | Irga8             | NGGLLAAGLYFRKTYYLQFHFLDTVAEDAKVLLKEAYSKK-----        | 413 |
| hmm150870        | Irga5             | -----YMEKAFYLQLFLDTVAEDAKVLLRETCSRN-----             | 371 |
| hmm191837        | Irgd              | KGGPESSAFQALKVYRRTQFLNIIVDDAKHLRLKIETVNVA-----       | 420 |
| hmm186086        | Irgc              | FGTLVAGGISFGTVYTMLQGLNEMAEDAQRVRIKALEEDEPQGGEVSL     | 415 |
| hmm175852        | Irgm2             | FDYMKCCFTSHHSRCKQQKDI LDETAAKAKEVLLKILRLSIPHP-----   | 407 |
| <u>hmm264951</u> | <u>Iqtp/Irgm3</u> | WWYGLWNVVTRYFRHRQRHKLVIIEIVAENTKTSLRKALKDSVLPPEIH--- | 423 |
| hmm189057        | Irgm1             | ----FLPCVCCCLRRLRHKRMLFLVAQDTKNI L EKILRDSIFPPQI---- | 409 |

|                  |                   |                                                                        |     |     |     |
|------------------|-------------------|------------------------------------------------------------------------|-----|-----|-----|
|                  |                   | 451                                                                    | 475 | 500 |     |
| hmm191281        | Irgb5.1           | SLYREESVGKVFVPGPGSTFLFHFIEMFQSDSDELCHVHVLLLLTSGGLS                     |     |     | 462 |
| hmm128592        | Irgb5.2           | SLYREESVGKVFVPGPGSTFLFHFIEMFQSDSDELCHVHVLLLLTSGGLS                     |     |     | 462 |
| hmm189613        | Irgb9             | SPYWEESVGKVFVPGPGSTFLFHFFEMFQSDSDKLCHVHVLLLLTSWGLS                     |     |     | 462 |
| hmm190725        | Irgb2             | SPYREESVGKVFVPSPGSTFLFHFFEMFQSDSDKLCHVHVLLLLTSWGLS                     |     |     | 453 |
| hmm129148        | Irgb7Pseudo       | -----                                                                  |     |     |     |
| hmm192949        | Irgb6             | PEYWEA-----                                                            |     |     | 415 |
| hmm129148        |                   | PEYWEA-----                                                            |     |     | 436 |
| hmm191559        |                   | PEYWETGMEL-----                                                        |     |     | 441 |
| hmm128592        |                   | PEYWETGMEL-----                                                        |     |     | 441 |
| hmm190169        | Irgb8             | PEYWETGMEL-----                                                        |     |     | 441 |
| hmm191003        | Irgb1             | PEYWETGMEL-----                                                        |     |     | 441 |
| <u>hmm175574</u> | <u>Irgb10</u>     | -----                                                                  |     |     |     |
| hmm229405        | Irga6             | -----                                                                  |     |     |     |
| hmm150036        | Irga1             | -----                                                                  |     |     |     |
| hmm228849        | Irga2             | -----                                                                  |     |     |     |
| hmm151148        | Irga7             | -----                                                                  |     |     |     |
| hmm150592        | Irga4             | -----                                                                  |     |     |     |
| hmm150314        | Irga3             | -----                                                                  |     |     |     |
| hmm151704        | Irga8             | -----                                                                  |     |     |     |
| hmm150870        | Irga5             | -----                                                                  |     |     |     |
| hmm191837        | Irgd              | -----                                                                  |     |     |     |
| hmm186086        | Irgc              | AAGDNLVEKRSTGEGTSEEAPLSTRKLG L L L K Y I L D S W K R R D L S E D K - - |     |     | 463 |
| hmm175852        | Irgm2             | -----                                                                  |     |     |     |
| <u>hmm264951</u> | <u>Iqtp/Irgm3</u> | -----                                                                  |     |     |     |
| hmm189057        | Irgm1             | -----                                                                  |     |     |     |

|                  |                   |       |     |
|------------------|-------------------|-------|-----|
|                  |                   | 501   |     |
| hmm191281        | Irgb5.1           | SETVT | 467 |
| hmm128592        | Irgb5.2           | SETVT | 467 |
| hmm189613        | Irgb9             | GETVT | 467 |
| hmm190725        | Irgb2             | GETVT | 458 |
| hmm129148        | Irgb7Pseudo       | ----  |     |
| hmm192949        | Irgb6             | ----  |     |
| hmm129148        |                   | ----  |     |
| hmm191559        |                   | ----  |     |
| hmm128592        |                   | ----  |     |
| hmm190169        | Irgb8             | ----  |     |
| hmm191003        | Irgb1             | ----  |     |
| <u>hmm175574</u> | <u>Irgb10</u>     | ----  |     |
| hmm229405        | Irga6             | ----  |     |
| hmm150036        | Irga1             | ----  |     |
| hmm228849        | Irga2             | ----  |     |
| hmm151148        | Irga7             | ----  |     |
| hmm150592        | Irga4             | ----  |     |
| hmm150314        | Irga3             | ----  |     |
| hmm151704        | Irga8             | ----  |     |
| hmm150870        | Irga5             | ----  |     |
| hmm191837        | Irgd              | ----  |     |
| hmm186086        | Irgc              | ----  |     |
| hmm175852        | Irgm2             | ----  |     |
| <u>hmm264951</u> | <u>Iqtp/Irgm3</u> | ----  |     |
| hmm189057        | Irgm1             | ----  |     |
